# Supplementary material for: Akt signaling dynamics in individual cells
Source: Oxford University Press journal article supplement (doi:10.1242/jcs.168773), 2015-01-01
Supplement: jcs168773supp.pdf [file jcs168773supp.pdf]

## Supplemental Figures and Movies

(Gross and Rotwein JOCES/2015/168773)

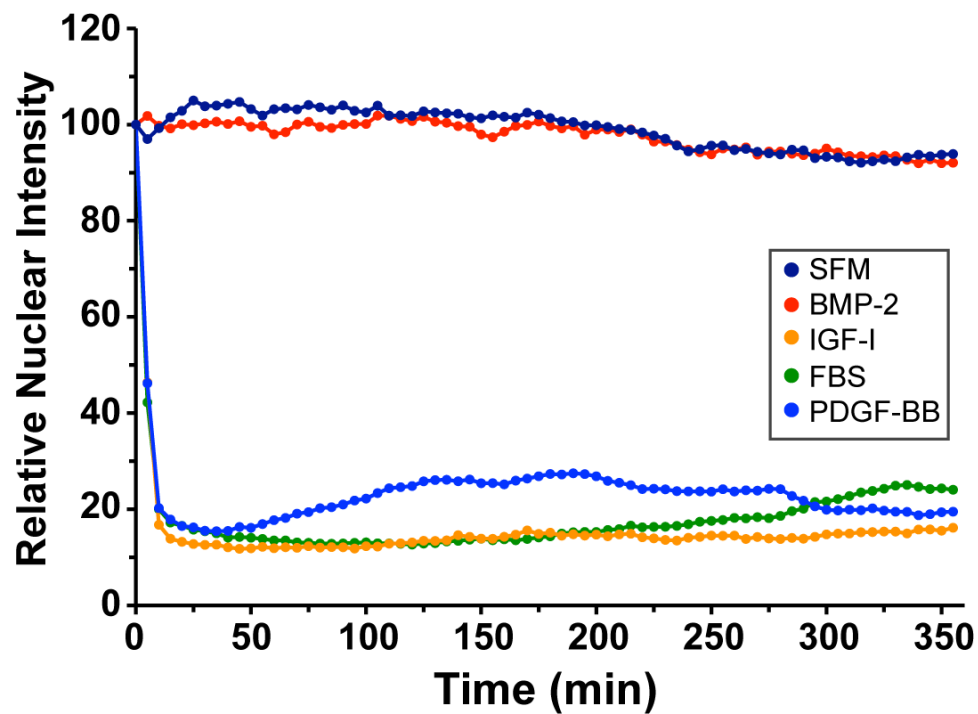

**Figure S1 (connects to Figure 2). Reporter dynamics after exposure of 10T1/2 cells to different growth factors.** Time course of relative nuclear intensity of the FoxO1-clover reporter in cells incubated in SFM and then exposed to SFM, BMP-2 [15 nM], R3-IGF-I [1 nM], 10% FBS, or PDGF-BB [206 pM] for 300 min. Population averages are presented ( $n = 50$  cells per incubation). The nuclear intensity of the reporter in each cell was normalized to its value at the start of imaging during incubation in SFM.

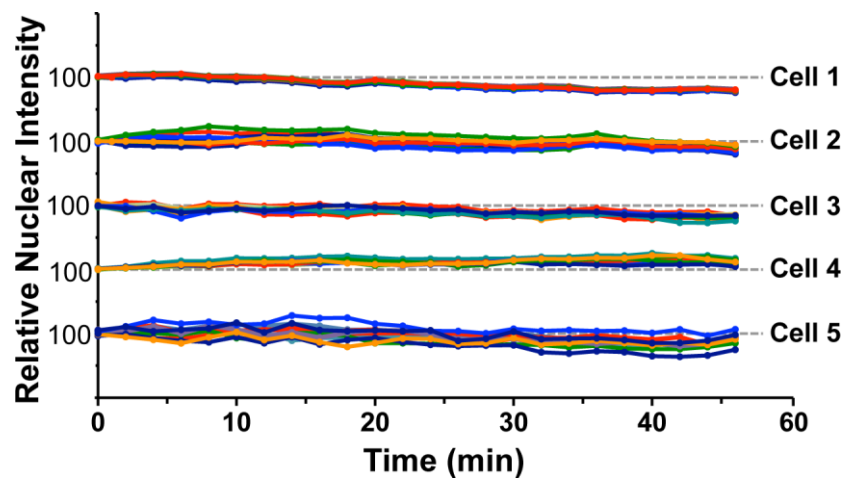

**Figure S2 (connects to Figure 3). Repeated cell quantification shows minimal variation.**

Tracings are depicted for each of 5 individual cells that were incubated in serum-free medium for 60 min and each tracked 10 times. The average deviation from the mean for all tracings was  $\pm 3\%$ .

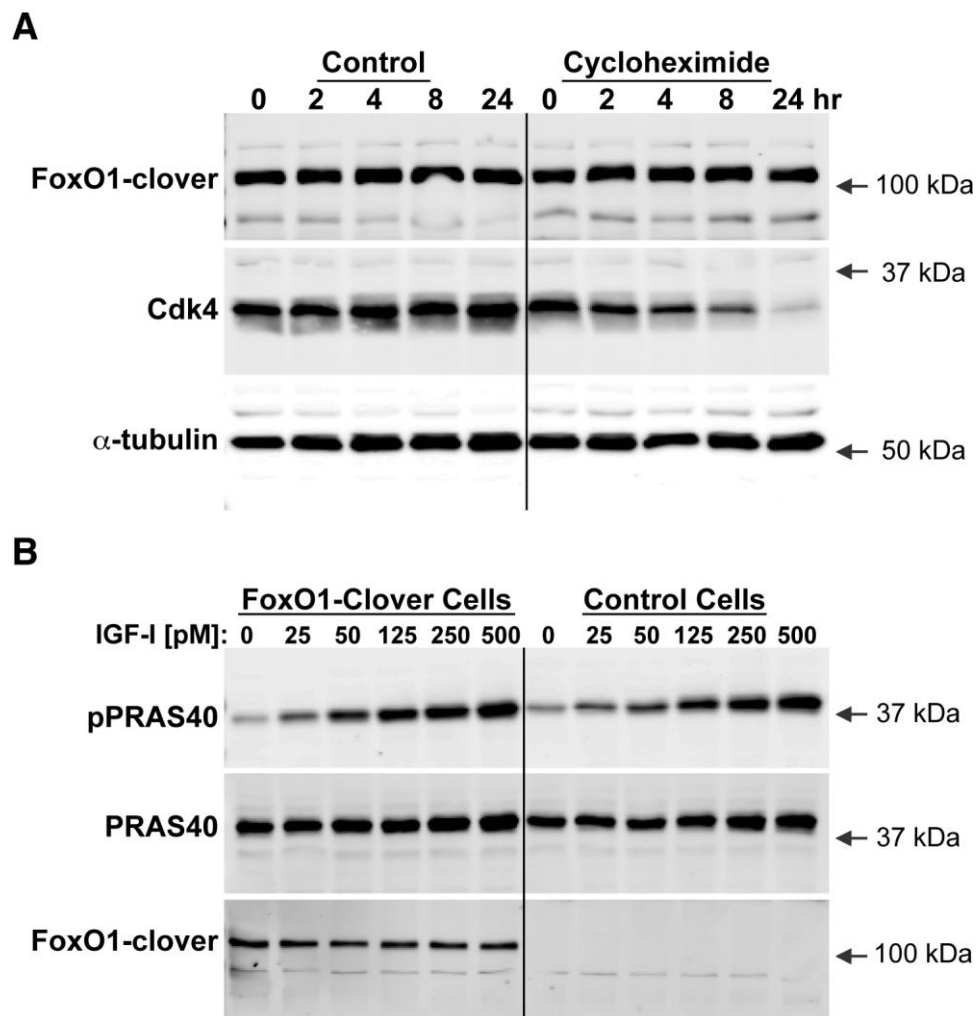

**Figure S3. Stability of the FoxO1-clover reporter and lack of inhibition by the reporter of other Akt signaling pathways.** **A.** Expression of FoxO1-clover, Cdk4, and  $\alpha$ -tubulin by immunoblotting using whole cell protein lysates isolated after incubation of cells with vehicle or the protein synthesis inhibitor, cycloheximide, for 0 to 24 hr. Molecular mass markers are indicated to the right of each immunoblot. **B.** Changes in levels of phosphorylation of the Akt substrate, PRAS40, after exposure of cells stably expressing FoxO1-clover or controls to different concentrations of R3-IGF-I for 60 min. Results are presented as immunoblots for phosphorylated (p) PRAS40, total PRAS40, or FoxO1-clover using whole cell lysates. Molecular mass markers are indicated to the right of each immunoblot.

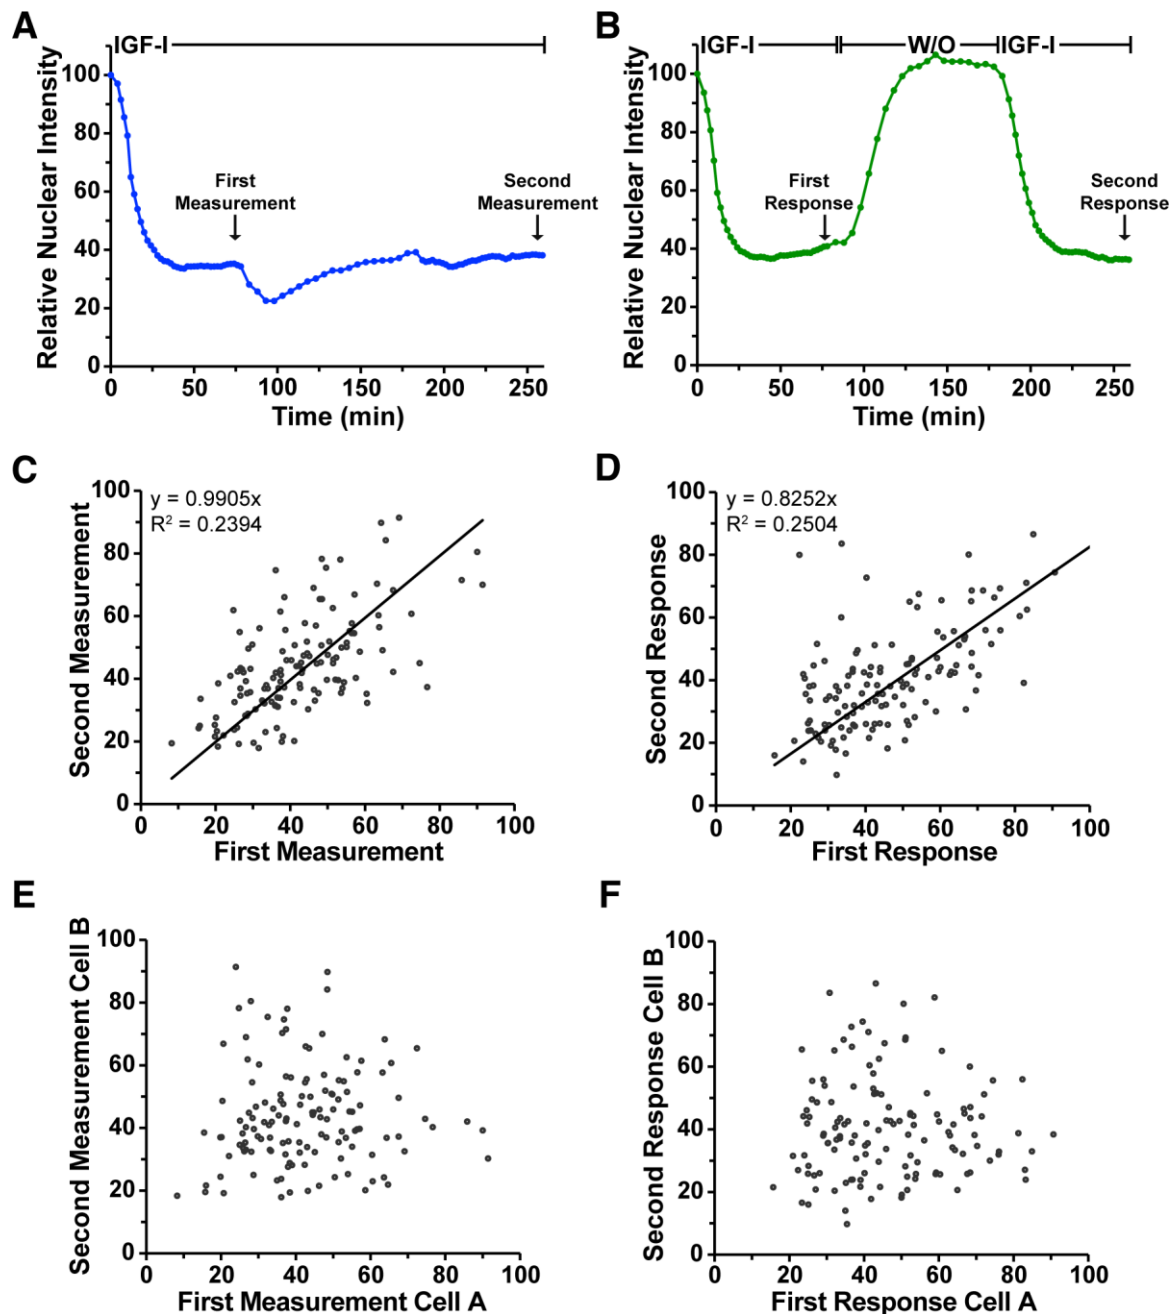

**Figure S4 (connects to Figure 6). Repeated exposure to IGF-I reveals heterogeneous effects on individual cells.** **A.** Time course of relative nuclear intensity of the FoxO1-clover reporter in 10T1/2 cells incubated from time 0 with R3-IGF-I [250 pM]. Population averages are presented ( $n = 50$  cells per incubation), and the measurement times for the data in the graphs in **C** and **E** are indicated by the arrows. **B.** Time course of relative nuclear intensity of the FoxO1-clover reporter incubated sequentially with R3-IGF-I [500 pM], SFM, and R3-IGF-I. Population averages are presented ( $n = 50$  cells per incubation). Data collection times for the graphs in **D** and **F** are labeled by arrows. **C.** Plot showing the relationship of reporter activity for the same cell at different times during sustained incubation with R3-IGF-I. The

line of best fit is depicted, and the slope and correlation coefficient are indicated ( $n = 150$  cells). **D.** Graph showing the relationship of reporter activity for the same cell at different times during sequential incubation with R3-IGF-I. The line of best fit is depicted, and the slope and correlation coefficient are indicated ( $n = 150$  cells). **E.** Plot showing the lack of relationship of reporter activity in different cells at different times during sustained incubation with R3-IGF-I ( $n = 150$  cells). **F.** Graph showing the lack of relationship of reporter activity in different cells at different times during sequential incubation with R3-IGF-I ( $n = 150$  cells).

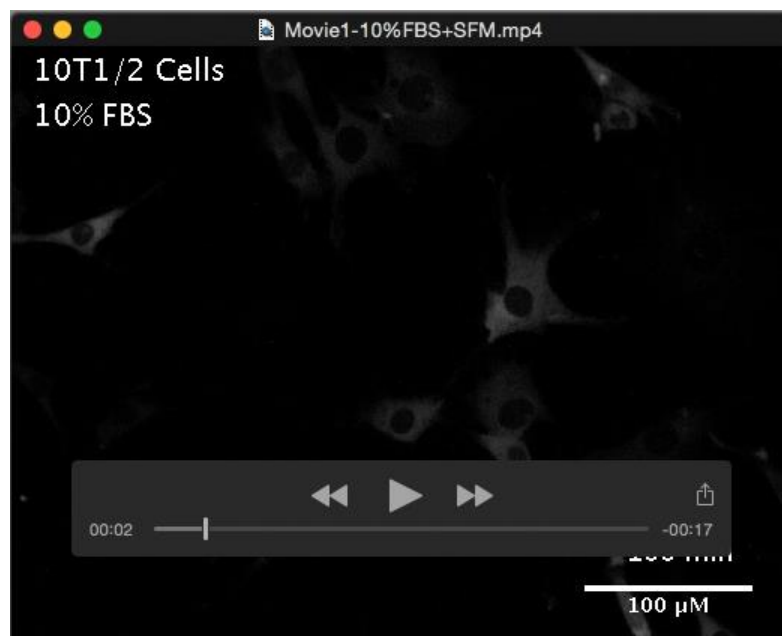

**Movie 1 (connects to Figure 2). Subcellular localization of the FoxoO1-clover reporter in 10T1/2 cells during incubation in 10% FBS followed by serum-free-medium.** Cells were incubated in 10% FBS for 1040 min after which the medium was replaced with serum-free medium for 80 min. Images were collected every 10 min by time-lapse epi-fluorescence microscopy (Evos FL Auto), and were registered and the background subtracted as described in Materials and Methods. The video playback rate is 6 frames per second.

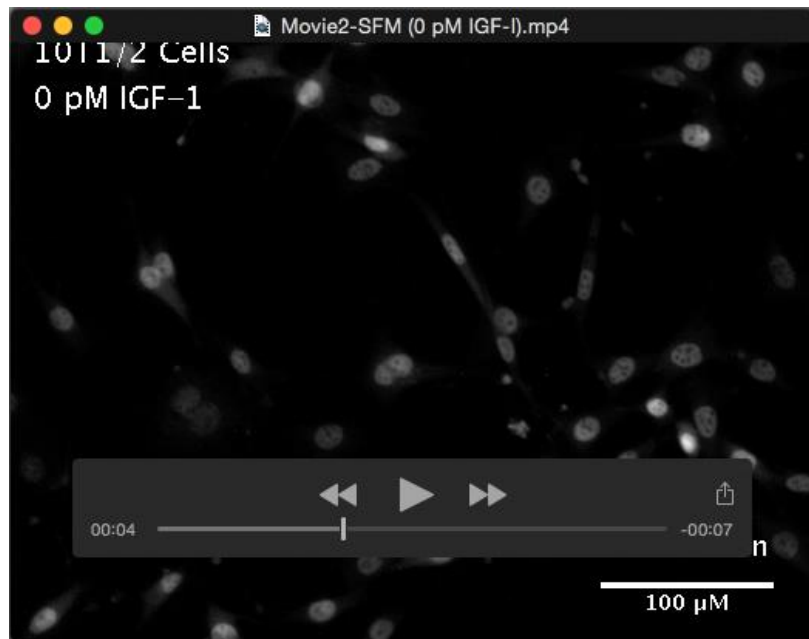

**Movie 2 (connects to Figure 4). Subcellular localization of the FoxoO1-clover reporter in 10T1/2 cells during incubation in serum-free medium.** Cells were incubated in serum-free medium, and images were collected every 2 min for 60 min by time-lapse epifluorescence microscopy (Evos FL Auto). Images were registered and the background was subtracted as described in Materials and Methods. The video playback rate is 3 frames per second.

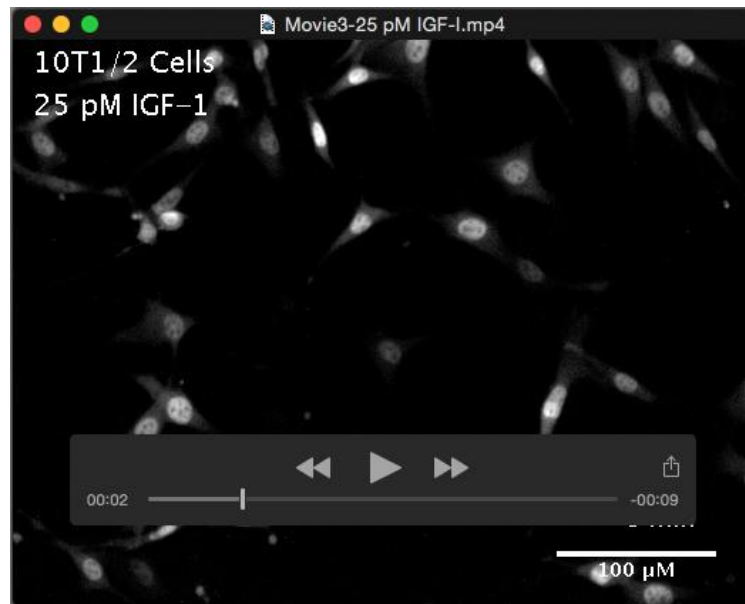

**Movie 3 (connects to Figure 4). Subcellular localization of the FoxoO1-clover reporter in 10T1/2 cells during exposure to R3-IGF-I [25 pM].** Cells were incubated in serum-free medium with R3-IGF-I, and images were collected every 2 min for 60 min by time-lapse epifluorescence microscopy (Evos FL Auto). Images were registered and the background was subtracted as described in Materials and Methods. The video playback rate is 3 frames per second.

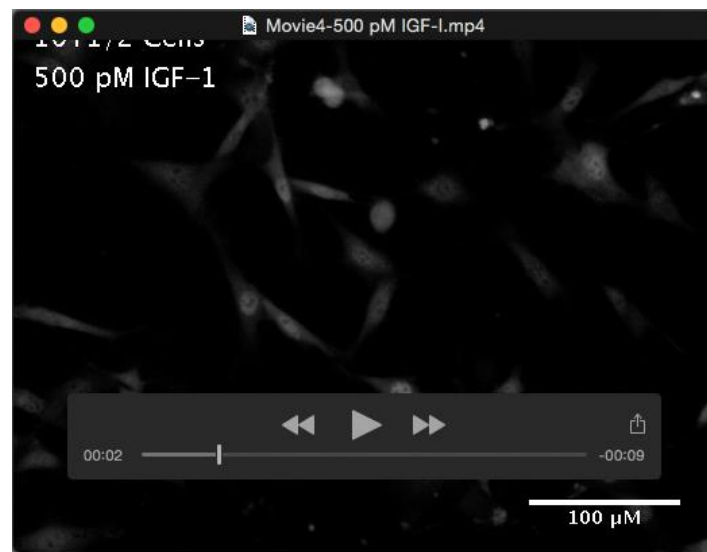

**Movie 4 (connects to Figure 4). Subcellular localization of the FoxoO1-clover reporter in 10T1/2 cells during exposure to R3-IGF-I [500 pM].** Cells were incubated in serum-free medium with R3-IGF-I, and images were collected every 2 min for 60 min by time-lapse epi-fluorescence microscopy (Evos FL Auto). Images were registered and the background was subtracted as described in Materials and Methods. The video playback rate is 3 frames per second.



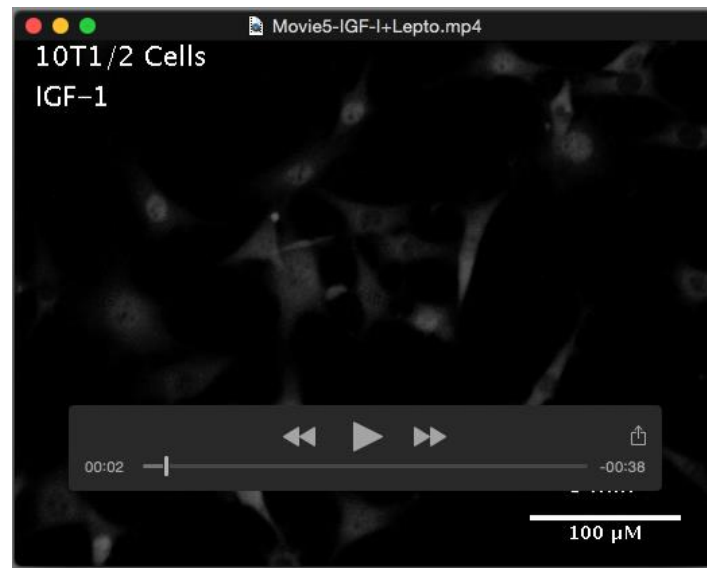

**Movie 5 (connects to Figure 7). Subcellular localization of the FoxoO1-clover reporter in 10T1/2 cells during sequential treatment with R3-IGF-I and leptomycin B.** Cells were incubated in serum-free medium with R3-IGF-I [250 pM] for 60 min and leptomycin B [100 nM] was added for 180 min. Images were collected every 2 min by time-lapse epifluorescence microscopy (Evos FL Auto). Images were registered and the background was subtracted as described in Materials and Methods. The video playback rate is 3 frames per second.

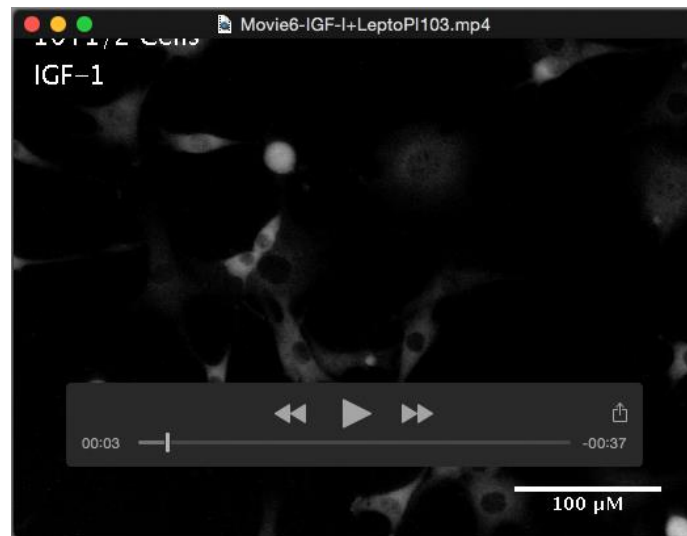

**Movie 6 (connects to Figure 7). Subcellular localization of the FoxoO1-clover reporter in 10T1/2 cells during treatment with R3-IGF-I followed by addition of both PI103 and leptomycin B.** Cells were incubated in serum-free medium with R3-IGF-I [250 pM] for 60 min and PI103 [500 nM] and leptomycin B [100 nM] were added together for 180 min. Images were collected every 2 min by time-lapse epi-fluorescence microscopy (Evos FL Auto). Images were registered and the background was subtracted as described in Materials and Methods. The video playback rate is 3 frames per second.

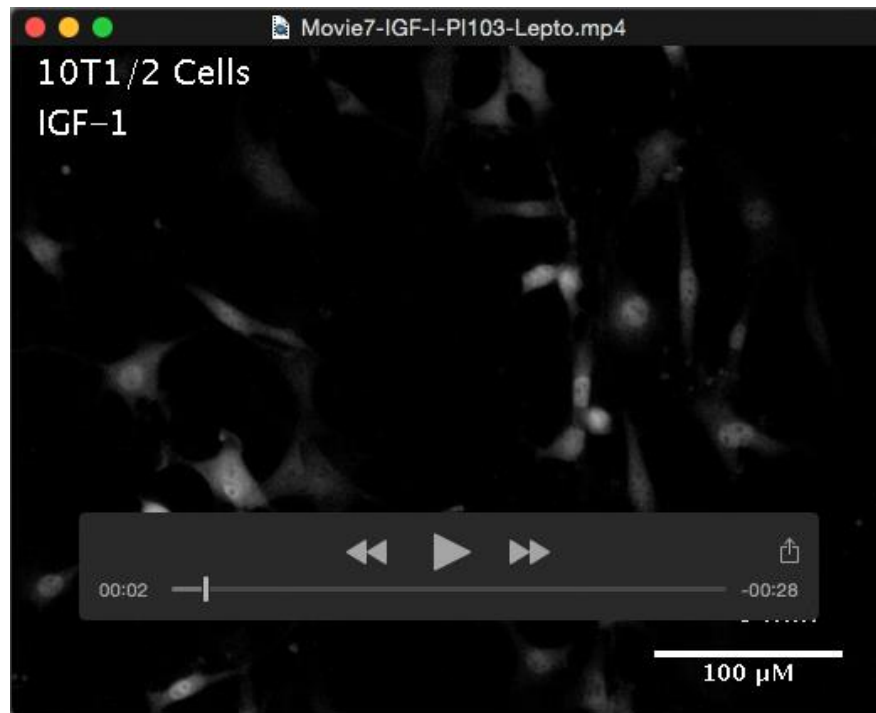

**Movie 7 (connects to Figure 8). Subcellular localization of the FoxoO1-clover reporter in 10T1/2 cells during sequential treatment with R3-IGF-I, PI103, and leptomycin B.**

Cells were incubated in serum-free medium with R3-IGF-I [500 pM] for 60 min. PI103 [500 nM] was added during the next 60 min, and leptomycin B [100 nM] for the final 60 min. Images were collected every 2 min by time-lapse epi-fluorescence microscopy (Evos FL Auto) for 180 min. Images were registered and the background was subtracted as described in Materials and Methods. The video playback rate is 3 frames per second.
